# Supplementary material for: Effect of nanosized and surface-structural-modified nano-pyroxene on adsorption of violanthrone-79
Source: Royal Society of Chemistry journal article supplement (doi:10.1039/c6ra05838h), 2016-01-01
Supplement: c6ra05838h1.pdf [file c6ra05838h1.pdf]

## Electronic Supplementary Information:

# Effect of Nanosized and Surface-Structural-Modified Nano-Pyroxene on Adsorption of Violanthrone-79

*Maryam Hmoudah, Nashaat N. Nassar\*, Gerardo Vitale and Amjad El-Qanni*

Department of Chemical and Petroleum Engineering, University of Calgary, 2500 University Drive N.W., Calgary, AB. T2N 1N4, Canada

\*(Email: [nassar@ucalgary.ca](mailto:nassar@ucalgary.ca), Tel: +1-403-210-9772, Fax: +1-403-210-3973)

### Table of Contents

**Table S1.** Synthesis conditions for different sized nano-pyroxene, Page S2

**Table S2.** Synthesis conditions for functionalized nano-pyroxene, Page S2

**Table S3.** Nominal atomic ratios nano-pyroxene, Page S3

**Table S4.** Potential parameters used in the present calculations, Page S6

**Table S5.** Comparison of structural values obtained by the optimization procedure with GULP with those experimentally reported for aegirine, Page S7

**Table S6.** Elastic stiffness coefficients (in GPa) for aegirine as calculated in this work with the interatomic potentials and their comparison with experimental data, Page S8

**S1.** Computational modeling, Page S3

**S1.1** VO-79 molecule, Page S3

**S1.2** Aegirine structure and surfaces, Page S3

**References.** Page S8

**Table S1.** Synthesis conditions for different-sized nano-pyroxene.

| <b>Gel</b> | <b>Particle sizes (nm)</b> | <b>Molar ratios of components</b>                                                                                                            | <b>Temperature (°C)</b> | <b>Time (h)</b> | <b>Seeding (g)</b> | <b>Calcination (°C, h)</b> |
|------------|----------------------------|----------------------------------------------------------------------------------------------------------------------------------------------|-------------------------|-----------------|--------------------|----------------------------|
| 1          | 10                         | 13.91 Na <sub>2</sub> O : 9.7 SiO <sub>2</sub> : Fe <sub>2</sub> O <sub>3</sub> : 305 H <sub>2</sub> O : 6.83 H <sub>2</sub> SO <sub>4</sub> | 160                     | 72              | No                 | No                         |
| 2          | 21                         | 11.6 Na <sub>2</sub> O : 6.9 SiO <sub>2</sub> : Fe <sub>2</sub> O <sub>3</sub> : 290 H <sub>2</sub> O : 4.5 H <sub>2</sub> SO <sub>4</sub>   | 220                     | 24              | No                 | No                         |
| 3          | 34                         | 9.1 Na <sub>2</sub> O : 5.02 SiO <sub>2</sub> : Fe <sub>2</sub> O <sub>3</sub> : 275 H <sub>2</sub> O : 4.7 H <sub>2</sub> SO <sub>4</sub>   | 220                     | 72              | No                 | No                         |
| 4          | 45                         | 8.2 Na <sub>2</sub> O : 4.02 SiO <sub>2</sub> : Fe <sub>2</sub> O <sub>3</sub> : 275 H <sub>2</sub> O : 4.7 H <sub>2</sub> SO <sub>4</sub>   | 250                     | 96              | Yes with PY-34     | No                         |
| 5          | 54                         | 8.2 Na <sub>2</sub> O : 4.02 SiO <sub>2</sub> : Fe <sub>2</sub> O <sub>3</sub> : 290 H <sub>2</sub> O : 4.6 H <sub>2</sub> SO <sub>4</sub>   | 250                     | 72              | Yes with PY-45     | No                         |
| 6          | 62                         | 8.2 Na <sub>2</sub> O : 4.02 SiO <sub>2</sub> : Fe <sub>2</sub> O <sub>3</sub> : 275 H <sub>2</sub> O : 4.7 H <sub>2</sub> SO <sub>4</sub>   | 250                     | 96              | Yes with PY-45     | Yes (850, 3)               |
| 7          | 99                         | 13.91 Na <sub>2</sub> O : 9.7 SiO <sub>2</sub> : Fe <sub>2</sub> O <sub>3</sub> : 305 H <sub>2</sub> O : 6.83 H <sub>2</sub> SO <sub>4</sub> | 160                     | 72              | No                 | Yes (800, 2)               |

**Table S2.** Synthesis conditions for functionalized nano-pyroxene.

| <b>Family</b> | <b>Molar ratio of components</b>                                                                                                                                         | <b>Compound used</b>                                 | <b>Ratio<sup>x</sup> Liquid/Solid</b> | <b>Method</b>        | <b>Calcination (°C, h)</b> |
|---------------|--------------------------------------------------------------------------------------------------------------------------------------------------------------------------|------------------------------------------------------|---------------------------------------|----------------------|----------------------------|
| PY-Ni         | -                                                                                                                                                                        | Ni(NO <sub>3</sub> ) <sub>2</sub> .6H <sub>2</sub> O | 0.78                                  | Wetting impregnation | 450, 3                     |
| PY -Ca        | -                                                                                                                                                                        | Ca(NO <sub>3</sub> ) <sub>2</sub> .4H <sub>2</sub> O | 20                                    | Ion exchange         | -                          |
| PY-H          | -                                                                                                                                                                        | H <sub>2</sub> SO <sub>4</sub>                       | 20                                    | Ion exchange         | -                          |
| PY-Ce         | 10.51 Na <sub>2</sub> O : 4.44 SiO <sub>2</sub> : 0.18 CeO <sub>2</sub> : Fe <sub>2</sub> O <sub>3</sub> : 321.52 H <sub>2</sub> O : 5.47 H <sub>2</sub> SO <sub>4</sub> | Ce(NO <sub>3</sub> ) <sub>3</sub> .6H <sub>2</sub> O | -                                     | Doping               | -                          |
| PY-Zr         | 9.19 Na <sub>2</sub> O : 3.43 SiO <sub>2</sub> : 0.15 ZrO <sub>2</sub> : Fe <sub>2</sub> O <sub>3</sub> : 290.57 H <sub>2</sub> O : 4.9 H <sub>2</sub> SO <sub>4</sub>   | ZrOCl <sub>2</sub> .8H <sub>2</sub> O                | -                                     | Doping               | -                          |

**Table S3.** Nominal atomic ratios of nano-pyroxene.

| <b>Ratio</b> | <b>Si/Fe</b> | <b>Si/Na</b> | <b>Na/Fe</b> | <b>O/Si</b> |
|--------------|--------------|--------------|--------------|-------------|
| PY           | 2            | 2            | 1            | 3           |

## **S1. Computational modeling**

### **S1.1 VO-79 molecule**

VO-79 molecule was built with BIOVIA Materials Studio builder module and optimized with BIOVIA Forcite module. The quality of the Geometry Optimization in BIOVIA Forcite was set to Fine: energy:  $1.0 \times 10^{-4}$  kcal/mol; max force:  $5.0 \times 10^{-3}$  kcal/mol/Å; max displacement:  $5.0 \times 10^{-5}$  Å, and using the smart algorithm with the BIOVIA COMPASS Forcefield. The optimized VO-79 molecule is presented in Figure 1b, where an almost flat configuration of the molecule can be noticed with one alkyl chain going out of the paper plane and the other one going down the paper plane.

### **S1.2 Aegirine structure and surfaces**

In order to get an atomistic understanding of the aegirine structure after isomorphous substitution of Si and Fe by Zr and Ce, respectively, as well as its ion exchange to replace the  $\text{Na}^+$  in the surface by  $\text{H}^+$  and  $\text{Ca}^{2+}$ , optimization of the aegirine structure was carried out first, then with the optimized structure (shown in Figure 1c), isomorphous replacement of part of the Si and Fe was carried out. Finally, a set of possible surfaces replacing  $\text{Na}^+$  by  $\text{H}^+$  or  $\text{Ca}^{2+}$  were generated and optimized. The optimized (001) surfaces are shown in Figure 9 in the accompanying manuscript. The General Utility Lattice Program, GULP<sup>1,2</sup> was used for all the calculations performed in this part of the study.

This type of calculation is based on lattice energy minimization using interatomic potentials which allows the simultaneous relaxation of the cell constants and the internal coordinates of the

structure. Inorganic, ionic and semionic crystal structures can be modeled by considering two-body ionic short range interaction potentials of the Buckingham type plus an Electrostatic Coulombic interaction term which is evaluated by the Ewald method.<sup>3</sup> This form is composed of a Born–Mayer repulsive exponential term and a  $r^{-6}$  attractive term:

$$E_{ij} = A_{ij} \exp\left(-\frac{r_{ij}}{\rho_{ij}}\right) - \frac{C_{ij}}{r_{ij}^6} + \frac{q_i q_j}{r_{ij}} \quad (\text{Eq. 1})$$

where  $r_{ij}$  is the distance between ions  $i$  and  $j$ , with charges  $q_i$  and  $q_j$ , and  $A_{ij}$ ,  $\rho_{ij}$  and  $C_{ij}$  are fitted parameters which for the present study are described in Table S9.

For the present work, we have used the well-known interatomic potential developed for silicates by Sanders et al,<sup>4</sup> and for the sodium the potentials reported by Bush et al.<sup>5</sup> The tetrahedral and octahedral configurations of oxygen atoms around silicon and iron atoms are better represented if we introduce a harmonic three-body short-range interaction potential for each one to simulate the covalent effects. This three-body potential is of the type

$$E_{ijk} = \frac{1}{2} K_{ijk} (\Theta - \Theta_0)^2 \quad (\text{Eq. 2})$$

It is a simple harmonic potential about the equilibrium bond angle, where  $K_{ijk}$  is the force constant and  $(\Theta - \Theta_0)$  is the deviation from the equilibrium angle, which is  $109.47^\circ$  and  $90^\circ$  respectively for the ideal tetrahedral and octahedral angles and, the values were taken from Winkler et al,<sup>6</sup> and Sainz-Diaz et al.<sup>7</sup>

The electronic polarizability of the ions is taken into account by using the classical model of Dick and Overhauser.<sup>8</sup> According to this polarizable ion model, the oxygen ions in the present case are represented by a core and a massless shell, connected by a spring. The electronic

polarizability of the model ion,  $EP$ , is then determined by the spring constant and the charges of the core and shell:

$$EP = \frac{1}{2}Kr^2 \quad (\text{Eq. 3})$$

where  $r$  is the separation distance between the centers of the core and the shell. In this work the core is assigned a charge of  $+0.86902e$  and the shell a charge of  $-2.86902e$ ,<sup>4</sup> maintaining the formal value for the overall ionic charge as  $-2$ . During the energy minimization calculations, the shell positions are allowed to relax about the ionic core resulting in a dipole that mimics the electronic polarization. In this model, all intermolecular potentials act on the shell of the atom if one exists or on the core if one does not.

The O and H atoms within the hydroxyl group are given non-formal charge values ( $H_{(\text{OH})} = +0.426e$  and  $O_{(\text{OH})} = -1.426e$ ),<sup>7</sup> although the overall charge on the hydroxyl ion has a formal charge of  $-1$ . The intramolecular OH interaction is described by a Morse potential:

$$E = D\{1 - \exp[-a(r - \mu)]\}^2 \quad (\text{Eq. 4})$$

where  $r$  and  $\mu$  are the observed and equilibrium interatomic distances, respectively. The parameters  $D$  and  $a$  are described in Table S9.<sup>7</sup> The interatomic potentials for iron in the pyroxene Aegirine were obtained by applying the relax fitting procedure within the GULP program. The structural parameters of Aegirine reported by Cameron et al,<sup>9</sup> and the elastic constants reported by Aleksandrov et al,<sup>10</sup> were used in the fitting. The obtained values are reported in Table S9.

To get an insight in the surface of the Aegirine materials, the program GTK Display Interface for Structures (GDIS)<sup>11</sup> was used to draw several possible surfaces and to produce the input files for the program GULP. All construction of the surface and structural manipulation were performed

independently from the main forcefield engine (GULP) by graphical means. This was achieved through the interface of the freely available program GDIS.<sup>11</sup> This interface allowed surfaces to be specified by their Miller indices, valid shifts to be searched for and the geometries then to be manipulated, for instance, replacing the surface sodium ions by Ca, H<sup>+</sup>, etc. Once the desired surface structure has been generated, then the necessary GULP calculation was performed.

**Table S4.** Potential parameters used in the present calculations.

| <b>Charges (e)</b>                      |               |                             |                                |
|-----------------------------------------|---------------|-----------------------------|--------------------------------|
| Ions                                    | Core          | Shell                       |                                |
| Si                                      | +4.00000      |                             |                                |
| Na                                      | +1.00000      |                             |                                |
| Fe                                      | +3.00000      |                             |                                |
| O                                       | +0.86902      | -2.86902                    |                                |
| Ce                                      | +3.00000      |                             |                                |
| Zr                                      | +4.00000      |                             |                                |
| Ca                                      | +2.00000      |                             |                                |
| O <sub>(OH)</sub>                       | -1.42600      |                             |                                |
| H <sub>(OH)</sub>                       | +0.42600      |                             |                                |
| <b>Buckingham</b>                       |               |                             |                                |
| Interaction <sup>a</sup>                | <i>A</i> (eV) | $\rho$ (Å)                  | <i>C</i> (eV Å <sup>-6</sup> ) |
| Si <sub>core</sub> - O <sub>shell</sub> | 1283.9070     | 0.320500                    | 10.6616                        |
| Na <sub>core</sub> - O <sub>shell</sub> | 1271.5040     | 0.300000                    | 0.0                            |
| Fe <sub>core</sub> - O <sub>shell</sub> | 661.80121     | 0.366356                    | 0.0                            |
| Ce <sub>core</sub> - O <sub>shell</sub> | 1731.6200     | 0.363700                    | 14.4300                        |
| Zr <sub>core</sub> - O <sub>shell</sub> | 1453.8000     | 0.350000                    | 0.0                            |
| Ca <sub>core</sub> - O <sub>shell</sub> | 874.68065     | 0.346346                    | 0.0                            |
| O <sub>shell</sub> - O <sub>shell</sub> | 22764.000     | 0.149000                    | 27.8800                        |
| Si <sub>core</sub> - O <sub>(OH)</sub>  | 983.55700     | 0.320500                    | 10.6616                        |
| Fe <sub>core</sub> - O <sub>(OH)</sub>  | 862.08000     | 0.329900                    | 0.00000                        |
| H <sub>(OH)</sub> - O <sub>shell</sub>  | 325.00000     | 0.250000                    | 0.00000                        |
| Morse potential                         | <i>D</i> (eV) | <i>a</i> (Å <sup>-1</sup> ) | $\mu$ (Å)                      |
|                                         | 7.0525        | 2.1986                      | 0.9485                         |

|                                                              |                                      |                    |
|--------------------------------------------------------------|--------------------------------------|--------------------|
| Spring Interaction                                           | $K$ (eV Å <sup>-2</sup> )            |                    |
| O <sub>core</sub> - O <sub>shell</sub>                       | 74.92000                             |                    |
| Three-body Interaction                                       | $k_{\theta}$ (eV rad <sup>-2</sup> ) | $\theta$ (degrees) |
| O <sub>shell</sub> - Si <sub>core</sub> - O <sub>shell</sub> | 2.0972                               | 109.47             |
| O <sub>shell</sub> - Fe <sub>core</sub> - O <sub>shell</sub> | 2.0972                               | 90.00              |
| O <sub>shell</sub> - Ce <sub>core</sub> - O <sub>shell</sub> | 2.0972                               | 90.00              |
| O <sub>shell</sub> - Zr <sub>core</sub> - O <sub>shell</sub> | 2.0972                               | 109.47             |

<sup>a</sup>The cutoff distance for the Buckingham potential was 12 Å

The surfaces consisted of two regions that are periodic in two dimensions. Atoms in region I contain the surface layers and are allowed to relax to mechanical equilibrium. Region II contains atoms that are further away from the surface into the bulk. These are kept fix at their bulk equilibrium position and represent the crystal continuum. The two regions, I and II, are ensured to be sufficiently large for the total energy to converge. The surfaces were then optimized using the program GULP in which the atoms of region I were allowed to relax, and the atoms in region II (representing the bulk) were fixed. The depth of each region was between 12 and 16 Å.

Table S10 and S11 show the comparison of the structural and elastic constant values obtained for aegirine, using the interatomic potentials described in Table S9, with the reported experimental values of those parameters. As it can be seen, the agreement is good between the reported values for aegirine and the calculated ones. Also, the partial replacement of Ce and Zr in the structure produces an increase in the cell parameters as expected (Table 3 in the accompanying manuscript).

**Table S5.** Comparison of structural values obtained by the optimization procedure with GULP with those experimentally reported for aegirine.

| Parameter | NaFeSi <sub>2</sub> O <sub>6</sub><br>*Cameron et al. <sup>9</sup> | NaFeSi <sub>2</sub> O <sub>6</sub><br>This work | NaFe <sub>0.92</sub> Ce <sub>0.08</sub> Si <sub>2</sub> O <sub>6</sub><br>This work | NaFeSi <sub>1.87</sub> Zr <sub>0.13</sub> O <sub>6</sub><br>This work |
|-----------|--------------------------------------------------------------------|-------------------------------------------------|-------------------------------------------------------------------------------------|-----------------------------------------------------------------------|
| a (Å)     | 9.658(2)                                                           | 9.705                                           | 9.776                                                                               | 9.825                                                                 |
| b (Å)     | 8.795(2)                                                           | 8.772                                           | 8.935                                                                               | 8.775                                                                 |
| c (Å)     | 5.294(1)                                                           | 5.297                                           | 5.329                                                                               | 5.371                                                                 |



|                     |           |        |        |        |
|---------------------|-----------|--------|--------|--------|
| $\beta$ (°)         | 107.42(2) | 106.29 | 105.77 | 106.54 |
| V (Å <sup>3</sup> ) | 429.1(1)  | 432.8  | 448.0  | 443.9  |

\*values in parenthesis are the reported standard deviation.

**Table S6.** Elastic stiffness coefficients (in GPa) for aegirine as calculated in this work with the interatomic potentials and their comparison with experimental data.<sup>10,12</sup>

| Stiffness coefficient | Aleksandrov et al. <sup>10</sup> | This work |
|-----------------------|----------------------------------|-----------|
| C11                   | 185.8                            | 169.7     |
| C22                   | 181.3                            | 166.4     |
| C33                   | 234.4                            | 279.9     |
| C44                   | 69.2                             | 62.1      |
| C55                   | 51.0                             | 42.3      |
| C66                   | 47.4                             | 56.2      |
| C12                   | 68.5                             | 75.7      |
| C13                   | 70.7                             | 82.2      |
| C23                   | 62.6                             | 96.1      |
| C15                   | 9.8                              | 19.6      |
| C25                   | 9.4                              | 15.0      |
| C46                   | 7.7                              | 11.3      |
| B*                    | 117                              | 118       |

\*Bulk modulus from reference 12.

## References

- [1] Gale, J. D. *J. Chem. Soc. Faraday Trans.* **1997**, *93*, 629-637.
- [2] Gale, J. D.; Rohl, A. L. *Mol. Simul.* **2003**, *29*, 291-341.
- [3] Ewald, P. P. *Ann. Phys. Leipzig* **1921**, *64*, 253-287.
- [4] Sanders, M. J.; Leslie, M.; Catlow, C. R. *J. Chem. Soc. Chem. Commun.* **1984**, *19*, 1271-1273.
- [5] Bush, T. S.; Gale, J. D.; Catlow, C. R. A.; Battle, P. D. *J. Mater. Chem.* **1994**, *4*, 831-837.
- [6] Winkler, B.; Dove, M. T.; Leslie, M. *Am. Mineral.* **1991**, *76*, 313-331.
- [7] Sainz-Diaz C. I.; Palin, E. J.; Hernandez-Laguna, A.; Dove, M. T. *Phys. Chem. Miner.* **2003**, *30*, 382-392.
- [8] Dick, B. G.; Overhauser, A. W. *Phys. Rev.* **1958**, *112*, 90-103.
- [9] Cameron, M.; Sueno, S.; Prewitt, C. T.; Papike, J. J. *Am. Mineral.* **1973**, *58*, 594-618.

- [10] Aleksandrov, K. S.; Ryzhova, T. V.; Belikov, B. P. *Sov. Phys. Crystallogr.* **1964**, *8*, 589-591.
- [11] Fleming, S. D.; Rohl, A. L. *Z. Kristallogr.* **2005**, *220*, 580-584.
- [12] McCarthy, A. C.; Downs, R. T.; Thompson, R. M.; Redhammer, G. J. *Am. Mineral.* **2008**, *93*, 1829-1837.
